# Supplementary material
Source: PubMed Central journal article supplement (PMC10876291)
Supplement: NIHMS1959149-supplement-Supplemental_Figures.pdf [file NIHMS1959149-supplement-Supplemental_Figures.pdf]

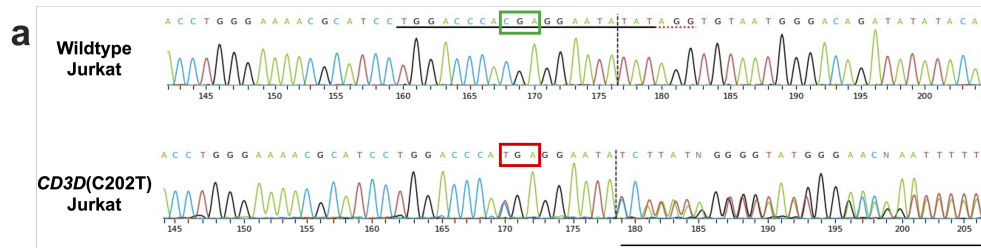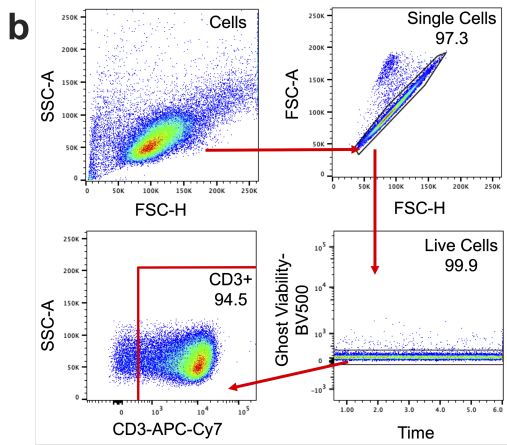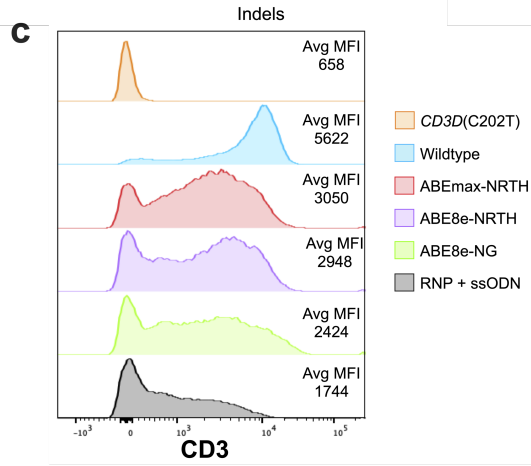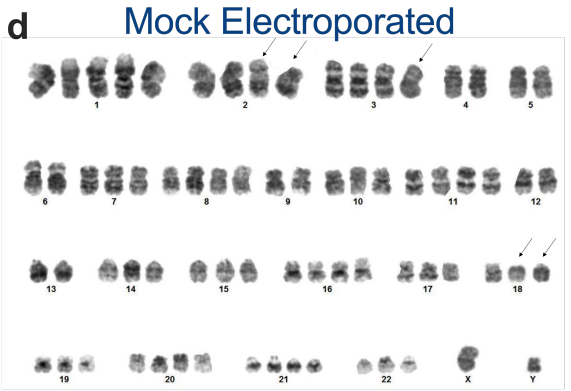

59~80<3n>,XXY,+1,+2,del(2)(p23p21)x2,+3,add(3)(p25)x2,-5,-6,+6,+8,-9,+11,+12,-13,+13,+14,+16,add(18)(p11.2)x2,+20,+21,-22[cp5]

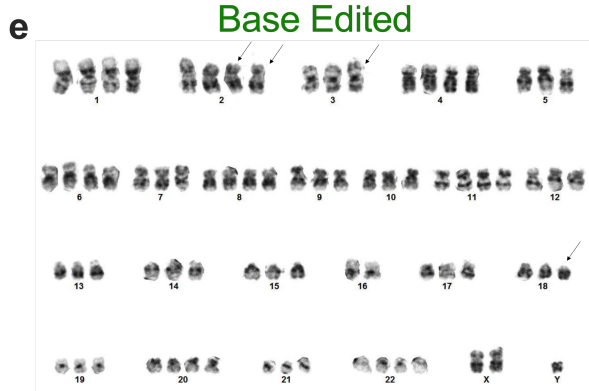

76~79<3n>,XXY,+1,+2,del(2)(p23p21)x2,+3,add(3)(p25),+4,+6,+7,+8,+11,+12,add(18)(p11.2),+20,+22[cp3]

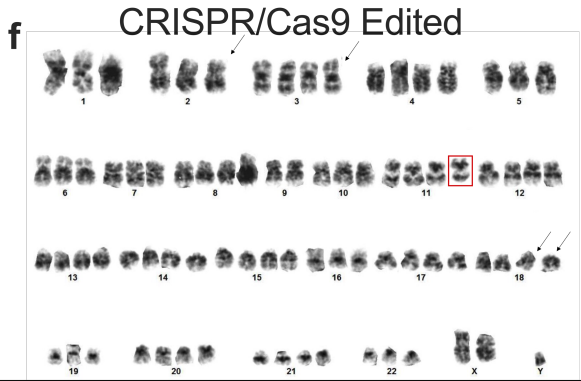

59~80<3n>,XXY,-Y,+1,+2,del(2)(p23p21)x2,+3,add(3)(p25),+4,-5,+6,+7,+8,-9,+10,+11,del(11)(q23),-12,+12,+13,+14,+15,+16,+17,+18,add(18)(p11.2)x2,-19,+20,+21,-22[cp7]

**Figure S1. Base Editing Efficiently Restores CD3 Expression without Inducing Chromothripsis, Related to Fig. 1**

**a)** Sanger sequencing traces confirm knockin of the *CD3D* c.202C>T pathogenic mutation in *CD3D* alleles with the remaining three alleles containing disruptive indels induced by CRISPR-mediated DSBs (rendering the latter three alleles uneditable, and therefore could be omitted from HTS analysis). Traces show the sense strand read 5' to 3'. The black dashed vertical line represents the Cas9 cut site during CRISPR editing, with approximately 150,000 total reads per population. **b)** Representative flow cytometry plots for CD3 surface expression. Top right: gating strategy to distinguish single cells. Bottom right: live cells. Bottom left: gating strategy to identify cells expressing CD3. SSC-A, side scatter area; FSC-A, forward scatter area; FSC-H, forward scatter height. **c)** Flow cytometry histogram profiling mean fluorescence intensity (MFI) of CD3 expression in CD3D(C202T) Jurkat T cells (orange), wildtype Jurkat T cells (blue), and ABEmax-NRTH (red), ABE8e-NRTH (purple), ABE8e-NG (green), and RNP + ssODN-treated cells (black). G-banded karyotypes each representing clonal abnormalities observed in cells from **d)** mock electroporated, **e)** base-edited with plasmids encoding ABEmax-NRTH and sgRNA, or **f)** edited with Cas9 RNP and ssODN. Due to the complexity of the cell lines, the clonal abnormalities are described as composite karyotypes (not all indicated abnormalities were identified in all abnormal cells analyzed) using standard cytogenetic nomenclature (ISCN). Diploid, triploid, and tetraploid cells were observed. Black arrows indicate clonal structural abnormalities inherent to the Jurkat T cell line.

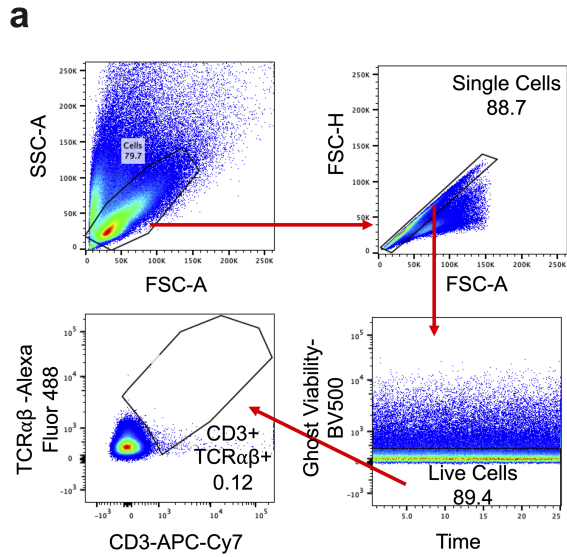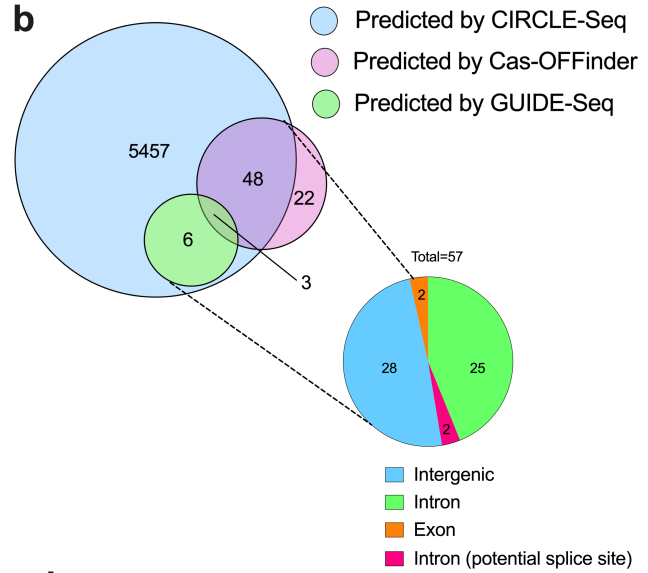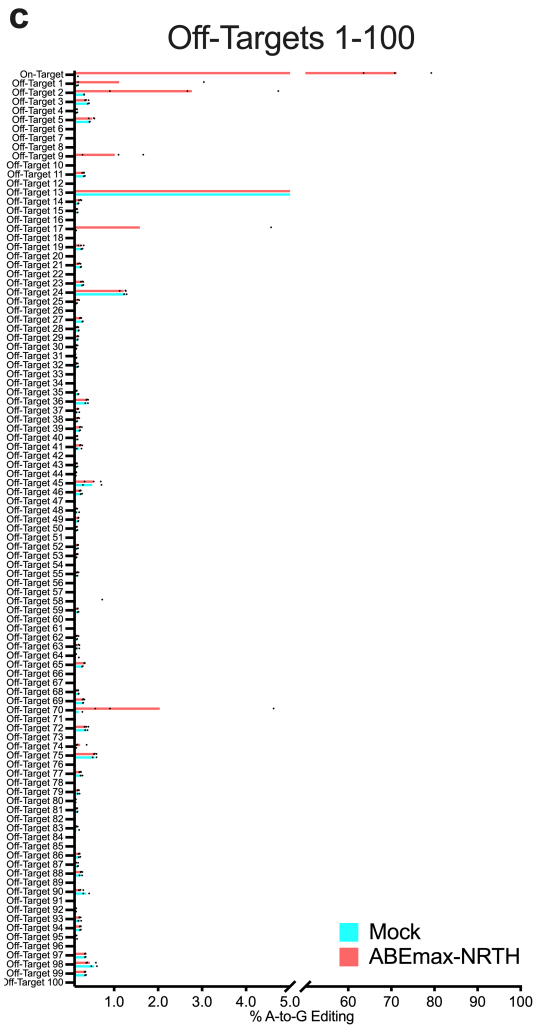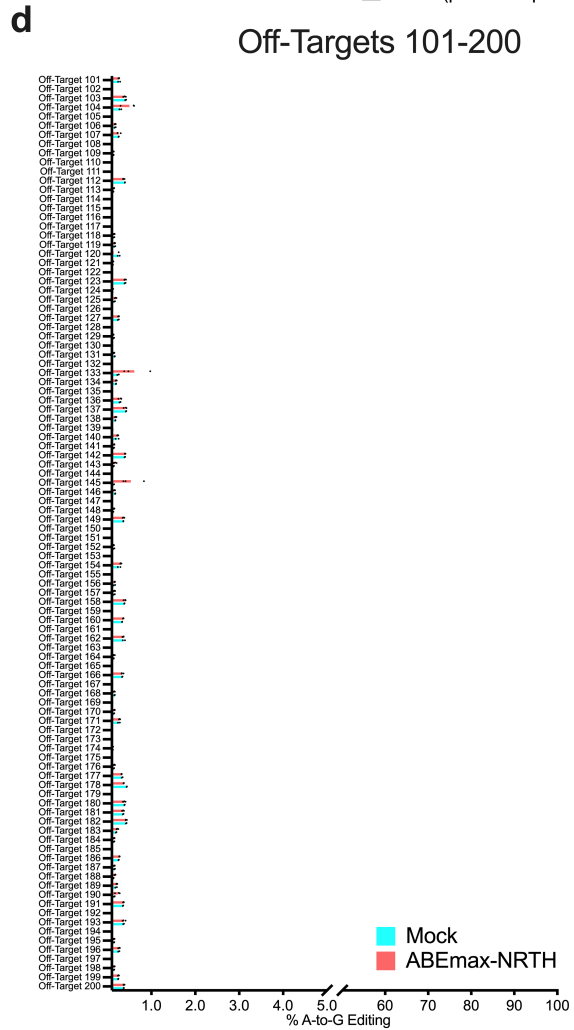

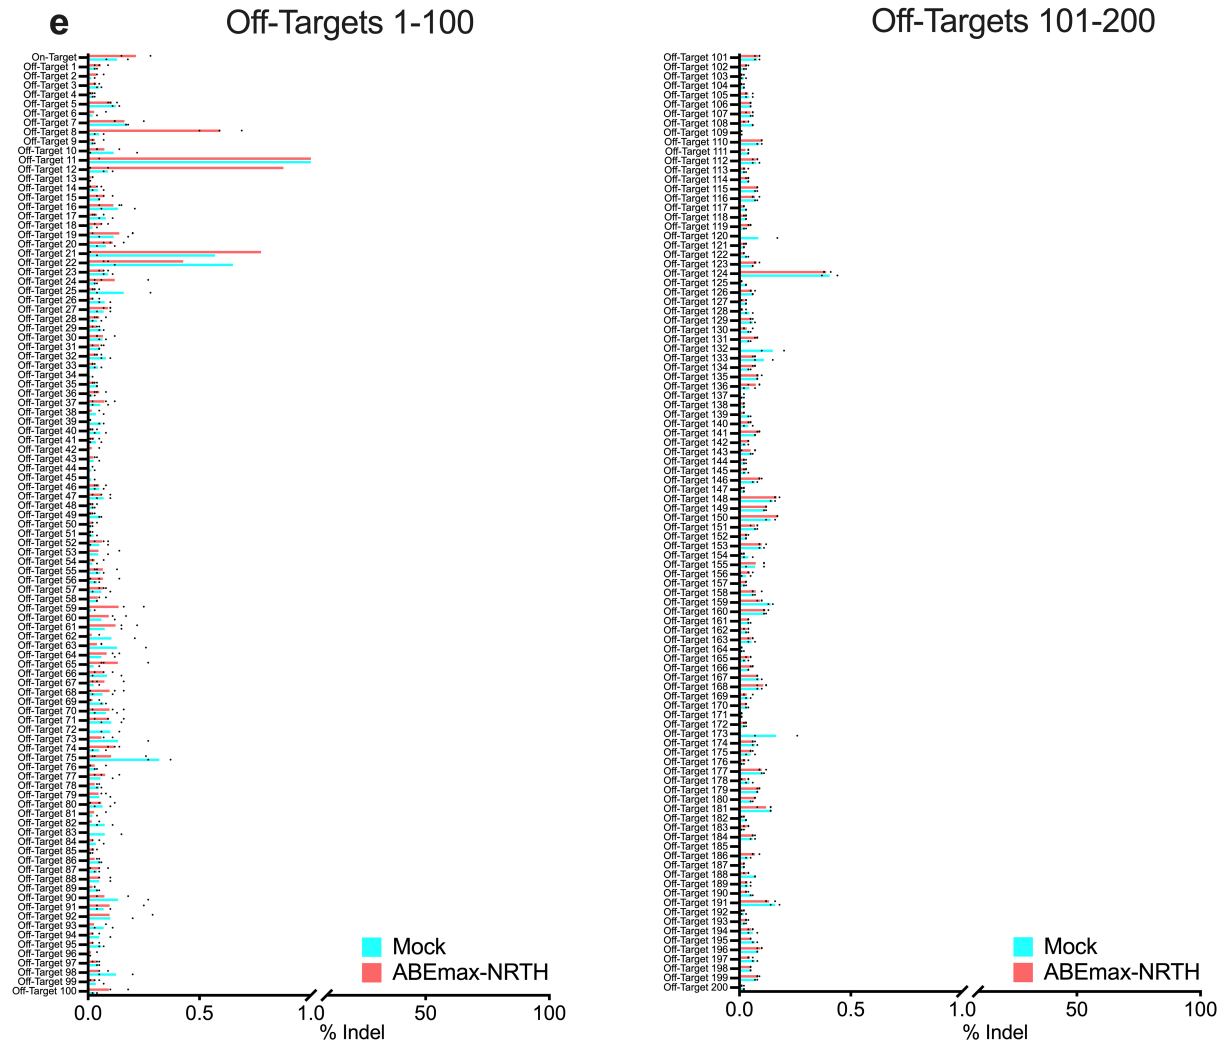

**Figure S2. Base Editing of CD3 $\delta$  SCID HSPCs Reveals Minimal Local Bystander and Genome-Wide Off-Target Editing and Indel Formation, Related to Fig. 2.**

**a)** Representative flow cytometry plots to measure CD3/TCR $\alpha$  surface expression in CD3D(C202T) Jurkat T cells transduced with either LV expressing WT CD3D cDNA or CD3D cDNA containing the A0 bystander mutation. Top right: gating strategy to distinguish single cells. Bottom right: live cells. Bottom left: gating strategy to identify cells expressing CD3/TCR $\alpha$ . **b)** Venn diagram of candidate off-target sites predicted by CIRCLE-seq, GUIDE-seq, and Cas-OFFinder. Pie graph depicts the predicted genomic locations of the 57 candidate off-target sites nominated by two or more prediction tools. **c-d)** Bar graphs demonstrate the percentage of sequencing reads containing A•T-to-G•C point mutations consistent with adenine base editing and within protospacer positions 4-10 in gDNA from CD3 $\delta$  SCID HSPCs treated with ABEmax-NRTH and sgRNA (peach) or untreated controls (teal). (n=3) **e)** Bar graphs demonstrate percent of sequencing reads containing indels across 200 genome-wide off-target sites. Sites were sequenced with HTS in gDNA from CD3 $\delta$  SCID HSPCs treated with ABEmax-NRTH mRNA (peach) or untreated controls (teal). (n=3)

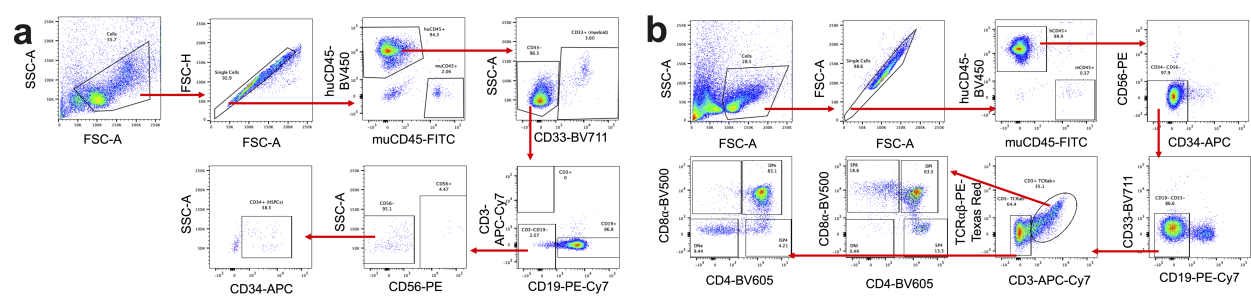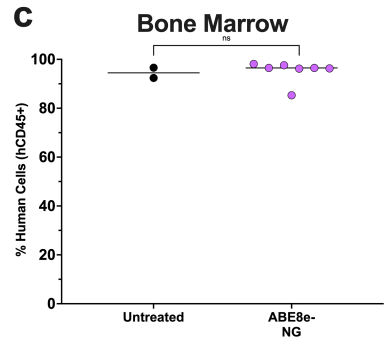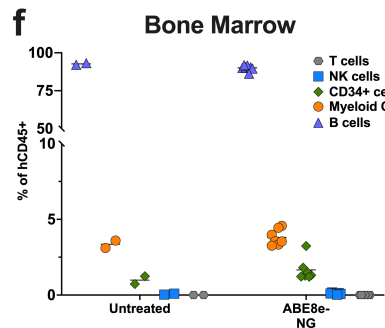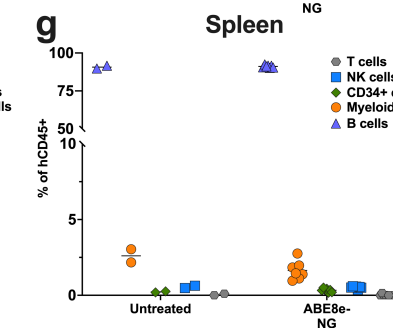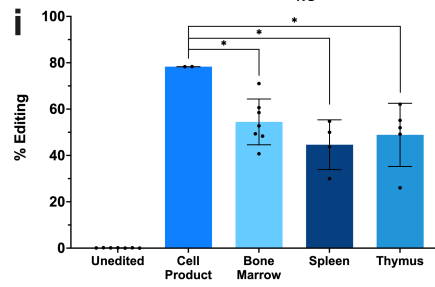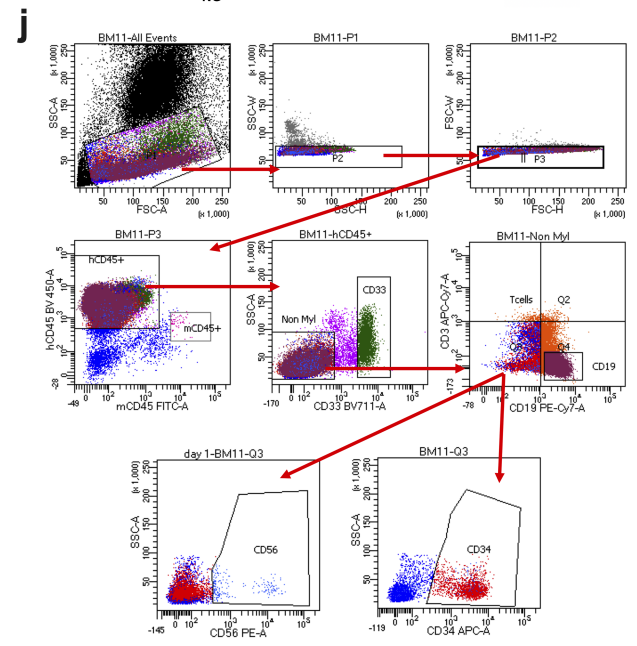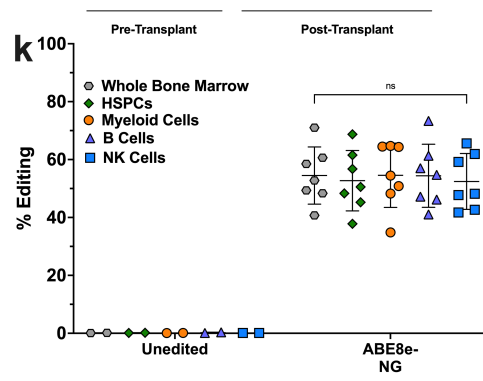

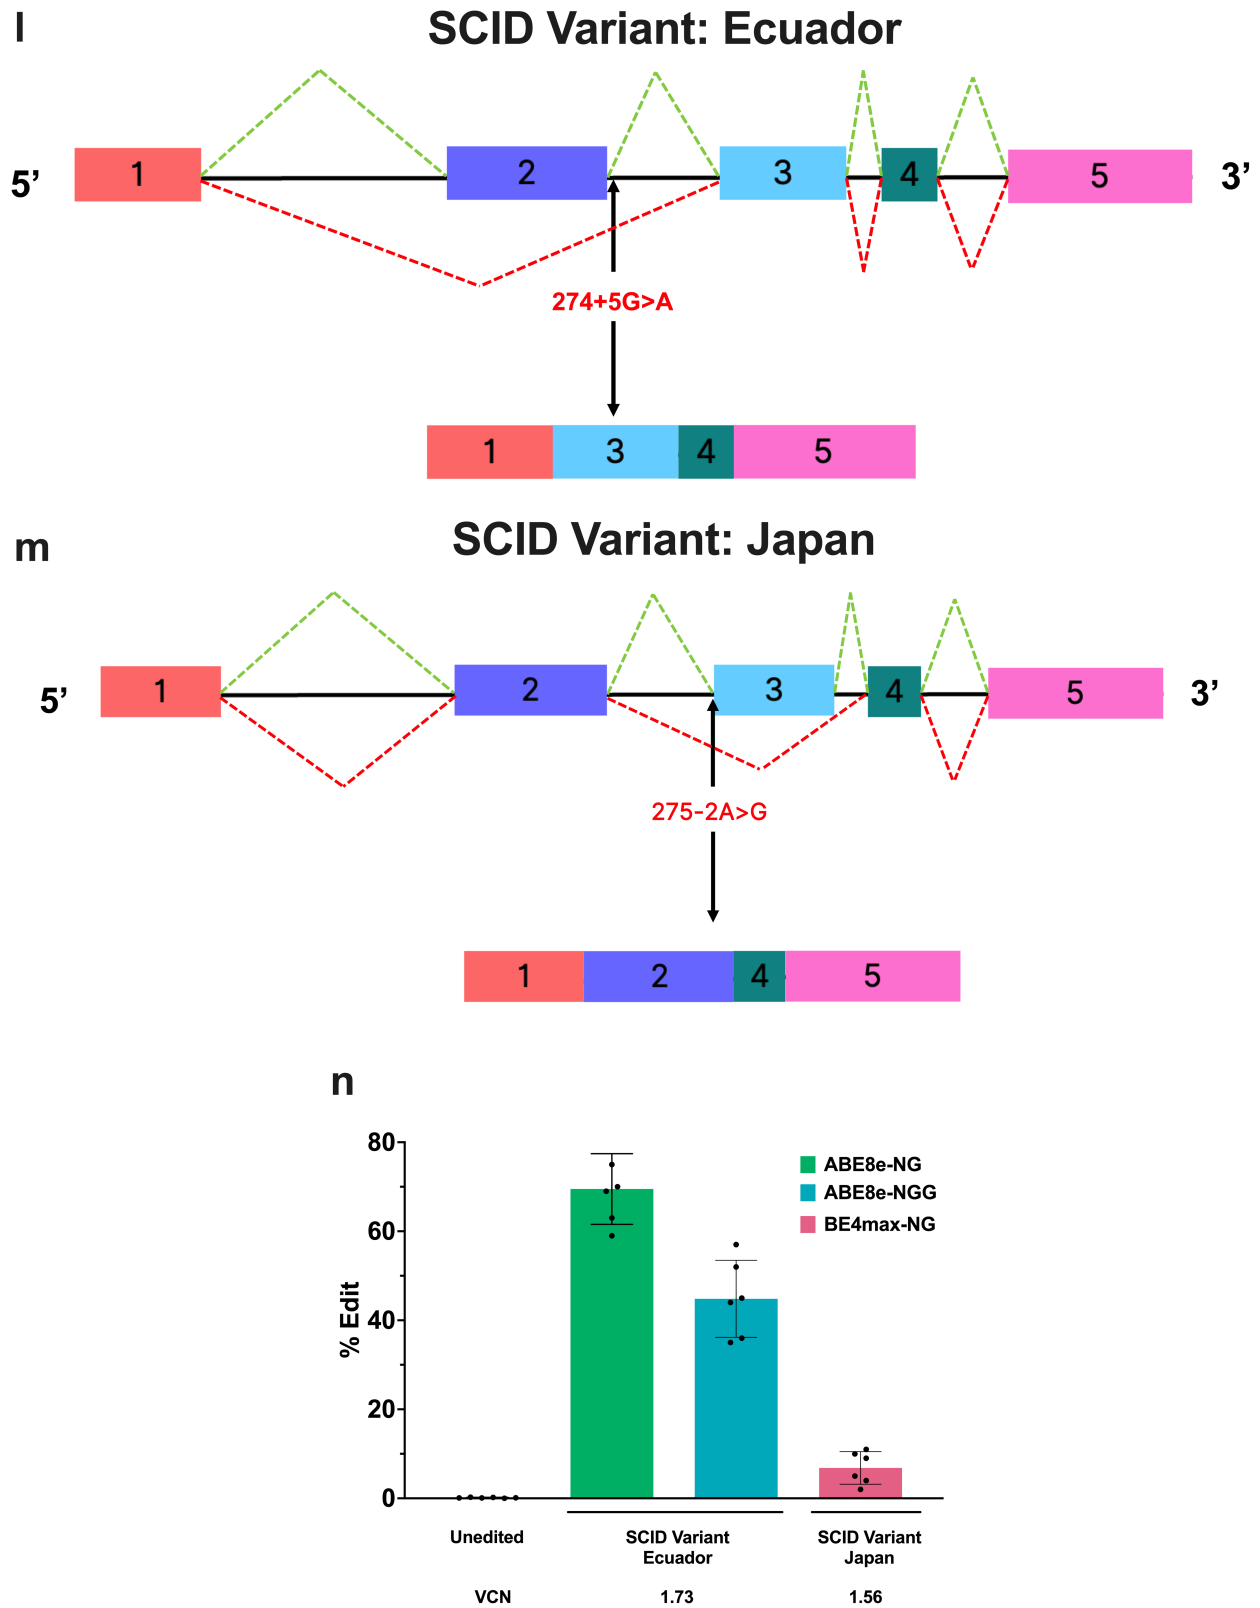

**Figure S3. Base Editing is Durable in a Humanized Mouse Model and Can Rescue Additional CD3 $\delta$  SCID-Causing Mutations in Human HSPCs, Related to Fig. 3.**

**a)** Gating strategy to quantify relative abundances of hematopoietic lineages in recipient mouse bone marrow. **b)** Gating strategy to determine relative abundances of thymocytes across T cell development in recipient mouse thymus. Sixteen weeks after infusion, engraftment was measured by percentage of human CD45<sup>+</sup> cells in recipient mouse **c)** bone marrow, **d)** spleen, and **e)** thymus for mice receiving untreated cells or ABE8e-NG treated cells. Abundance of human CD19<sup>+</sup> B cells, CD33<sup>+</sup> myeloid, CD34<sup>+</sup> HSPCs, CD56<sup>+</sup> NK cells, and CD3<sup>+</sup> T cells were measured as percentages of the hCD45<sup>+</sup> population in transplant recipient **f)** bone marrow and **g)** spleen. **h)** Human CD3-TCR $\alpha\beta$ -CD4<sup>+</sup> immature SP (CD4 ISP), CD3+TCR $\alpha\beta$ +CD4<sup>+</sup> (CD4 SP), CD3+TCR $\alpha\beta$ +CD8<sup>+</sup> single-positive (CD8 SP), CD4-CD8<sup>-</sup> double-negative (DN), and CD4+CD8<sup>+</sup> double-positive (DP) cells as percentages of the hCD45<sup>+</sup> population in recipient mouse thymus. **i)** *on-target* editing efficiency and VCN determined by HTS and ddPCR, respectively, in cells cultured for 14 days after electroporation (pre-transplant) or in whole tissues 16 weeks after transplant. **j)** Gating strategy for FACS isolation of CD34<sup>+</sup> HSPCs, CD33<sup>+</sup> Myeloid, CD19<sup>+</sup> B cells, and CD56<sup>+</sup> NK cells from mouse bone marrow. **k)** Editing efficiency in human-derived hematopoietic lineages from mouse bone marrow. Populations were FACS sorted using hCD34<sup>+</sup>, hCD33<sup>+</sup>, hCD19<sup>+</sup>, and hCD56<sup>+</sup> antibodies for HSPC, myeloid, B cell, and NK cell collection, respectively. n=2 mice that received untreated cells and n=7 mice that received ABE8e-NG edited cells. Data shown as mean  $\pm$  SD; **k)** one-way ANOVA, non-parametric t-test elsewhere; ns, not significant. **l)** Schematic of the splicing mutation (identified in Ecuador) known to cause CD3 $\delta$  SCID. A homozygous mutation in the splice donor site of intron 2 leads to abnormal splicing and exon 2 skipping (*CD3D* c.274+5G>A).<sup>44</sup> **m)** Schematic of the splicing mutation, *CD3D* c.275-2A>G, (identified in Japan) known to cause CD3 $\delta$  SCID.<sup>64</sup> A homozygous mutation in the splice acceptor site of intron 2 leads to abnormal splicing and exon 3 skipping. **n)** Healthy donor (HD) CD34<sup>+</sup> HSPCs were pre-stimulated for 24 hours and transduced with a lentiviral vector [containing either the *CD3D* c.274+5G>A mutation (MNDU3-CD3D-274+5G>A) or *CD3D* c.275-2A>G mutation (MNDU3-CD3D-275-2A>G) in intron 2). Intron 2 was retained in the LV by positioning the internal expression cassette in reverse orientation. 24 hours after transduction, HSPCs were electroporated with ABE8e-NG, ABE8e-NGG, or BE4max-NG mRNA and sgRNA. Data shown as mean  $\pm$  SD.

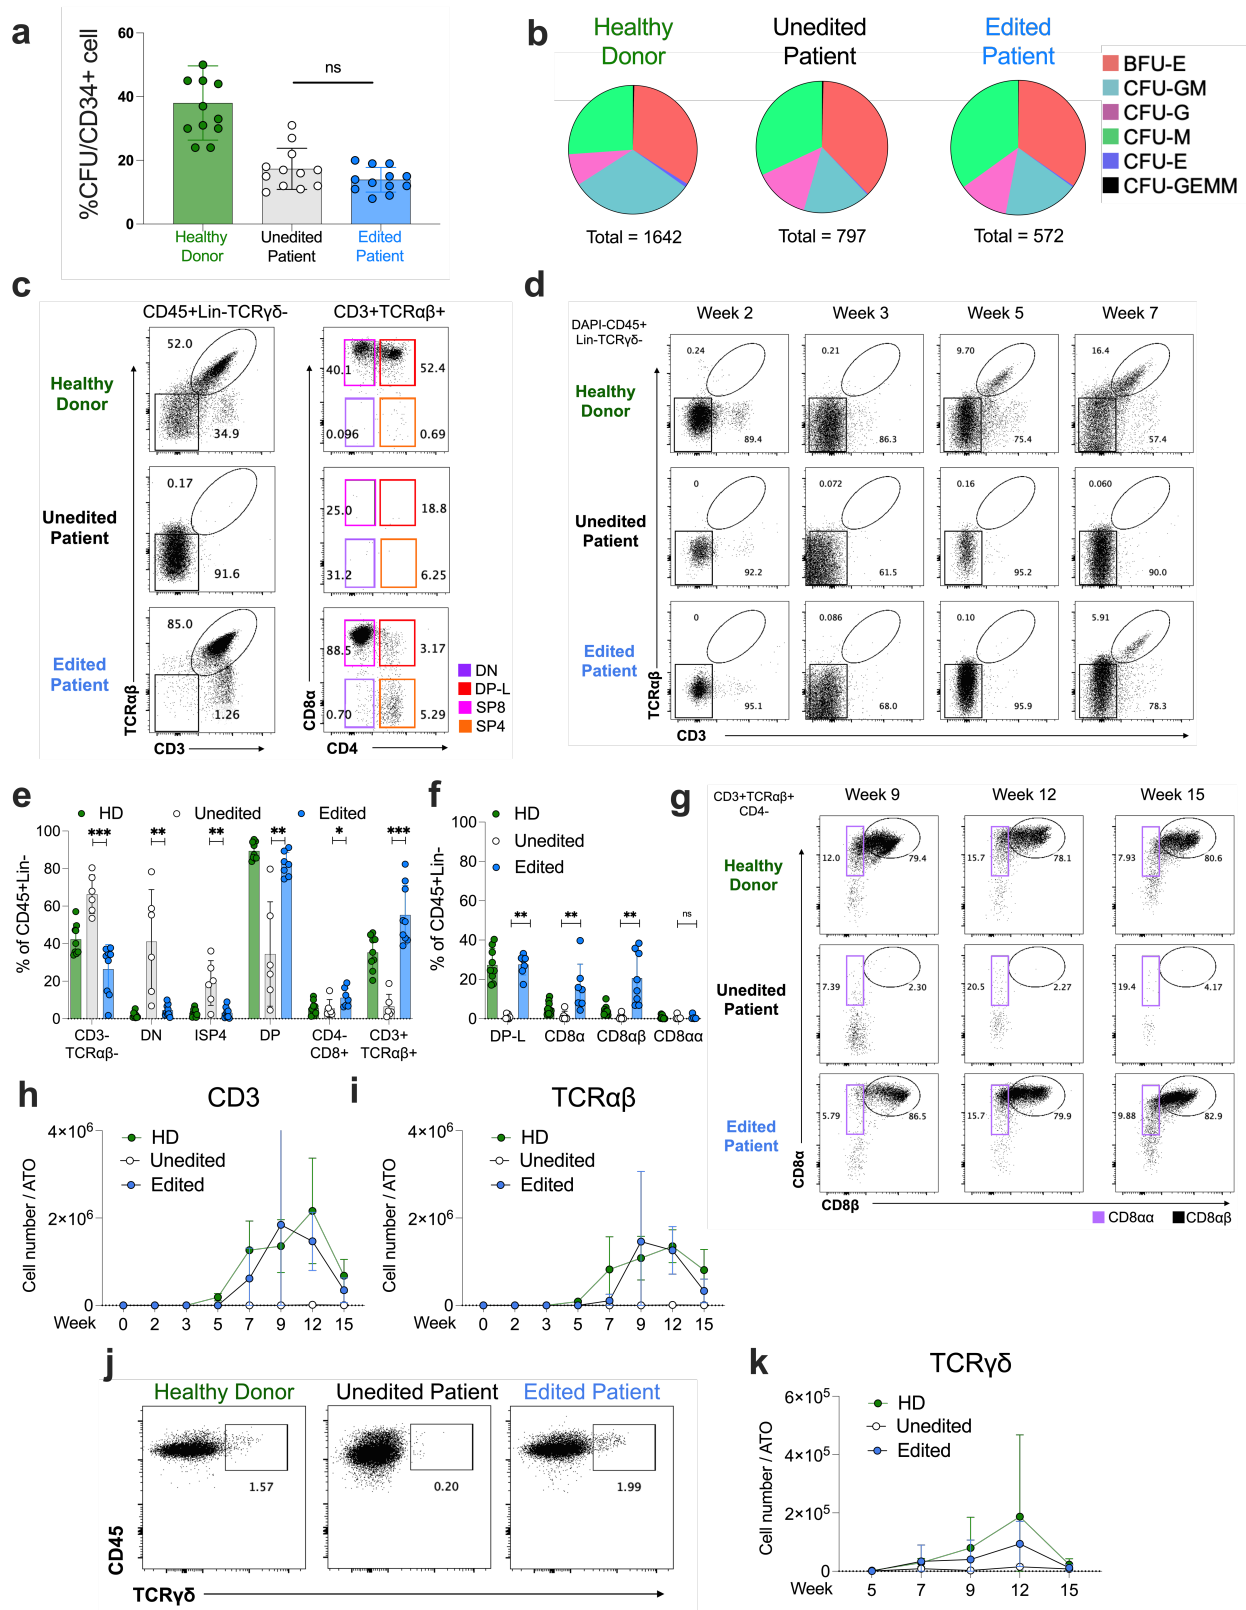

**Figure S4. Base Editing Retains Clonogenic Potential and Rescues T cell Differentiation and Maturation, Related to Fig. 4.**



**a-b)** Clonogenic potential. 24 hours following electroporation of CD3 $\delta$  SCID CD34<sup>+</sup> HSPCs, a CFU assay was performed to assess **a)** hematopoietic potential and **b)** hematopoietic lineage distribution of CD34<sup>+</sup> HSPC HD, unedited, and edited patient T cells prior to ATO formation (n=12). Statistics were calculated using a non-parametric t-test; ns, not significant. **c-k)** Rescue of T cell differentiation. **c and d)** FACS analysis of HD (green), unedited patient (black), and edited patient (blue) ATOs, n=6-9, from four independent experiments for all data. **c)** CD3 and TCR $\alpha\beta$  co-expression (left), and developing T cell subsets (DN, DP-L, SP8, and SP4) (right) in ATOs at week 15. **d)** Early CD3 and TCR $\alpha\beta$  co-expression at weeks 2, 3, 5, and 7. Frequency of **e)** CD3-TCR $\alpha\beta$ <sup>-</sup>, DN, ISP4, DP, CD4-CD8<sup>+</sup>, and CD3+TCR $\alpha\beta$ <sup>+</sup> cells from CD45<sup>+</sup>Lin<sup>-</sup> cells, and **f)** DP-L, CD8 $\alpha$ , CD8 $\alpha\beta$  (SP8 T cells), and CD8 $\alpha\alpha$  cells from CD45<sup>+</sup>Lin<sup>-</sup> cells at week 12. **g)** Representative flow cytometry profiles of CD8 $\alpha\alpha$  and CD8 $\alpha\beta$  cells in cells gated on CD3+TCR $\alpha\beta$ +CD4<sup>-</sup> in HD, unedited patient, and edited patient ATOs at weeks 9, 12, and 15. Cell counts of **h)** CD3<sup>+</sup> and **i)** TCR $\alpha\beta$ <sup>+</sup> cells per ATO over time. **j)** Representative flow cytometry profiles of TCR $\gamma\delta$  expression in cells gated on CD45<sup>+</sup>Lin<sup>-</sup> at week 12. **k)** Cell counts of  $\gamma\delta$  T cells per ATO over time. Statistical significance was calculated using unpaired nonparametric T tests, \*\*p < 0.01; and \*\*\*p < 0.001.

**a**

| Cell numbers of developing T cell and immune cell subsets in unedited and edited CD3 $\delta$ SCID ATOs, identified by CITE-seq. |       |     |      |      |      |       |       |     |     |     |    |       |
|----------------------------------------------------------------------------------------------------------------------------------|-------|-----|------|------|------|-------|-------|-----|-----|-----|----|-------|
|                                                                                                                                  | CD34+ | DN  | ISP4 | DP-E | DP-L | SP8RO | SP8RA | NK  | gd  | pDC | B  | Total |
| <b>Unedited Exp#1</b>                                                                                                            | 114   | 820 | 5375 | 105  | 4    | 0     | 0     | 350 | 83  | 83  | 98 | 7000  |
| <b>Unedited Exp#2</b>                                                                                                            | 52    | 309 | 3796 | 69   | 4    | 0     | 0     | 229 | 21  | 21  | 48 | 4561  |
| <b>Edited Exp#1</b>                                                                                                              | 19    | 20  | 659  | 2393 | 1756 | 203   | 52    | 96  | 324 | 324 | 4  | 5530  |
| <b>Edited Exp#2</b>                                                                                                              | 23    | 95  | 800  | 1753 | 1643 | 75    | 48    | 46  | 144 | 1   | 9  | 4637  |

**b**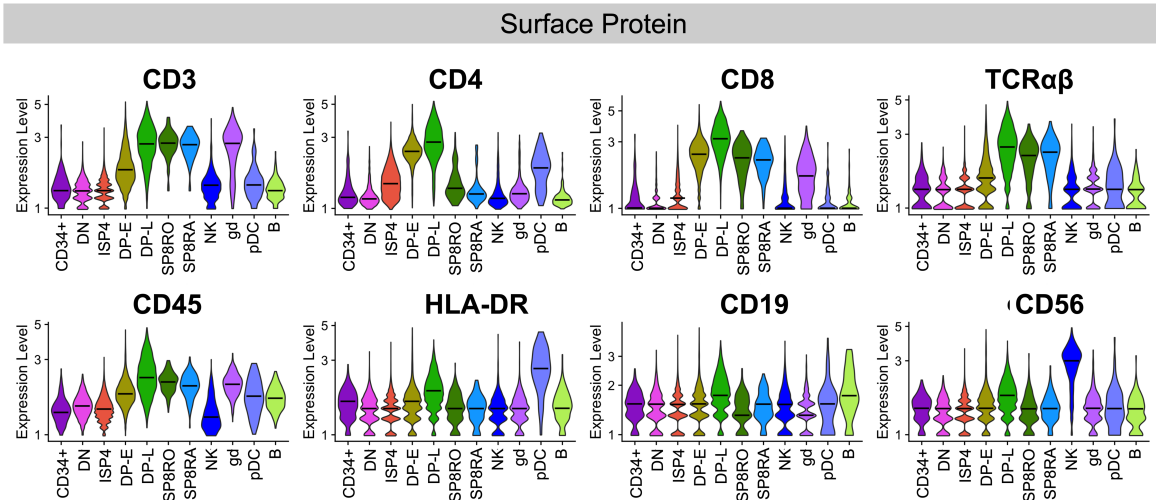**c**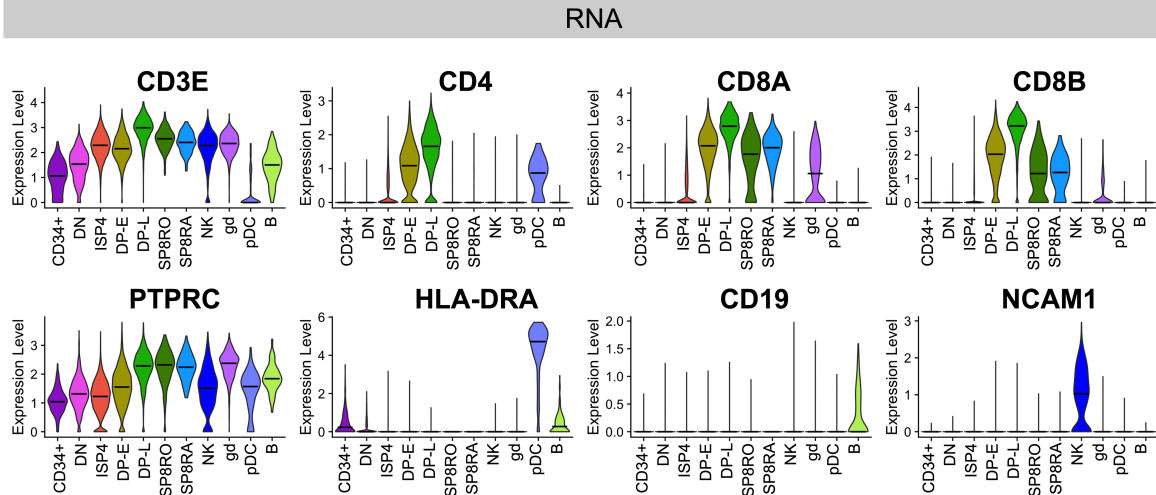

**Figure S5. Identification of Developing T cell and Immune Cell Subsets in Unedited and Edited CD3 $\delta$  SCID ATOs by CITE-seq, Related to Fig. 5.**

**a)** Number of bioinformatically cleaned cells in indicated cell subsets in unedited and edited patient ATOs harvested at week 8 from two individual experiments. **b)** Surface protein and **c)** RNA gene expression of selected markers across cell subsets.

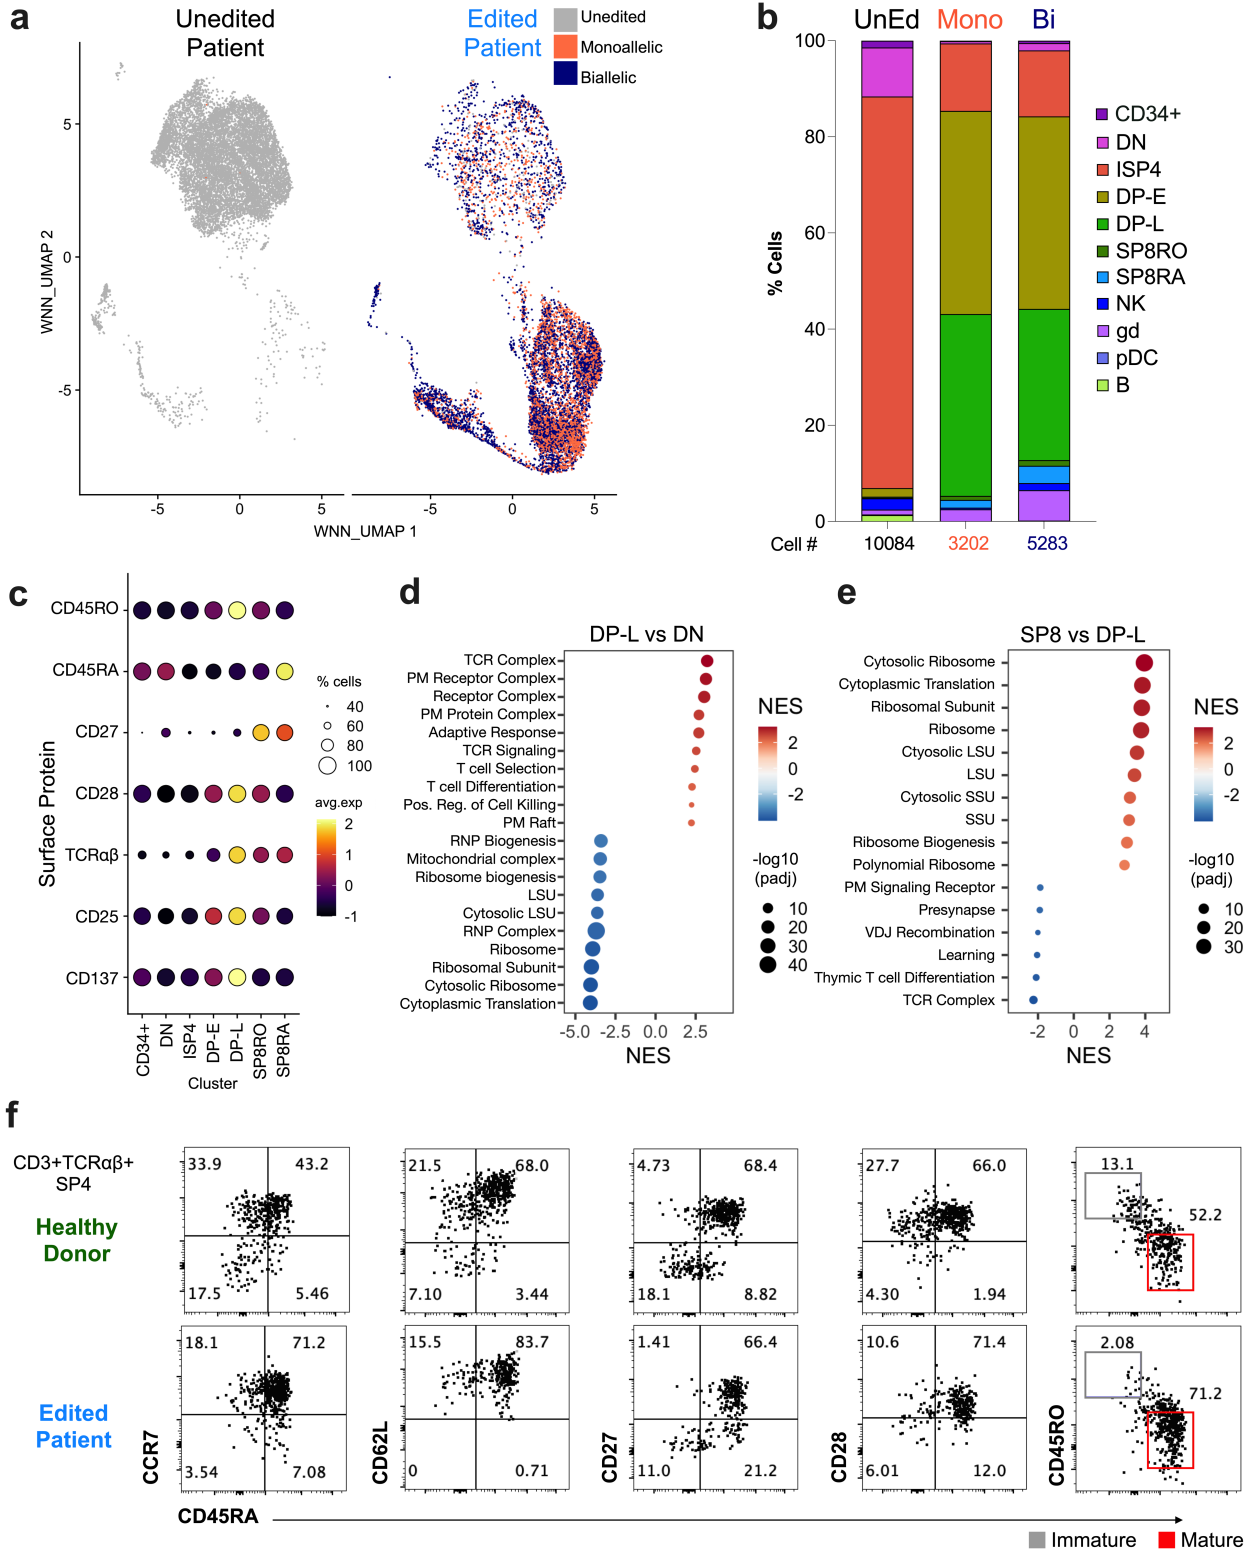

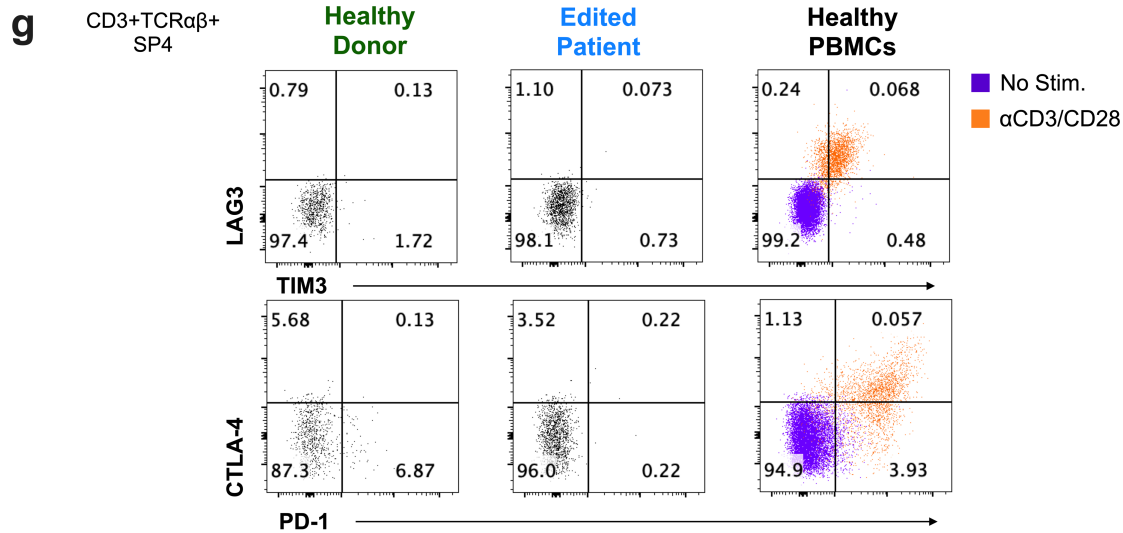

**Figure S6. Monoallelic and Biallelic *CD3D* Correction Rescues SP8 and SP4 T cell Development, Related to Fig. 6.**

**a-b)** Monoallelic and biallelic *CD3D* correction. **a)** WNN\_UMAP visualization of unedited (grey), monoallelic (orange), or biallelic (blue) correction of patient ATOs. **b)** Bar graphs show relative T cell precursor abundances of binned by the presence of unedited, monoallelic, or biallelic correction in single cells. Monoallelic vs. biallelic classification was determined by the presence of RNA strands with or without the *CD3D* c.202C>T edit. UnEd, unedited; Mono, monoallelic; Bi, biallelic. **c-g)** Edited *CD3δ* SCID ATO-derived SP8 T and SP4 T cells express features of maturation without evidence of exhaustion. **c)** Expression of indicated surface proteins (y-axis) across clusters in edited patient ATOs. **d-e)** Gene Set Enrichment Analysis (GSEA) of differentially expressed genes from GOBP (Gene Ontology Biological Process) and GOCC (Gene Ontology Cellular Compartment) between **d)** DP-L and DN, or **e)** SP8 T and DP-L cells. Dot size represents adjusted P-value (Padj; two-sided permutation test). NES, normalized enrichment score; PM, plasma membrane; RNP, ribonucleoprotein; LSU, large ribosomal subunit; SSU, small ribosomal subunit. **f)** Representative flow cytometry profiles depicting maturation markers (CCR7, CD62L, CD27, CD28, CD45RO, and CD45RA) in cells gated on SP4 T cells - CD3+TCRαβ+CD4+CD8-, in week 12 ATOs (n=9, from four independent experiments). **g)** Representative flow cytometry profiles of exhaustion markers in SP4 T cells derived from week 15 HD (green) and edited patient (blue) ATOs, and Healthy PBMCs (right) stimulated with (orange) and without (purple) anti-CD3/28 beads + IL2 for 24 hours, n=9 for ATO groups and n=3 for PBMC controls.

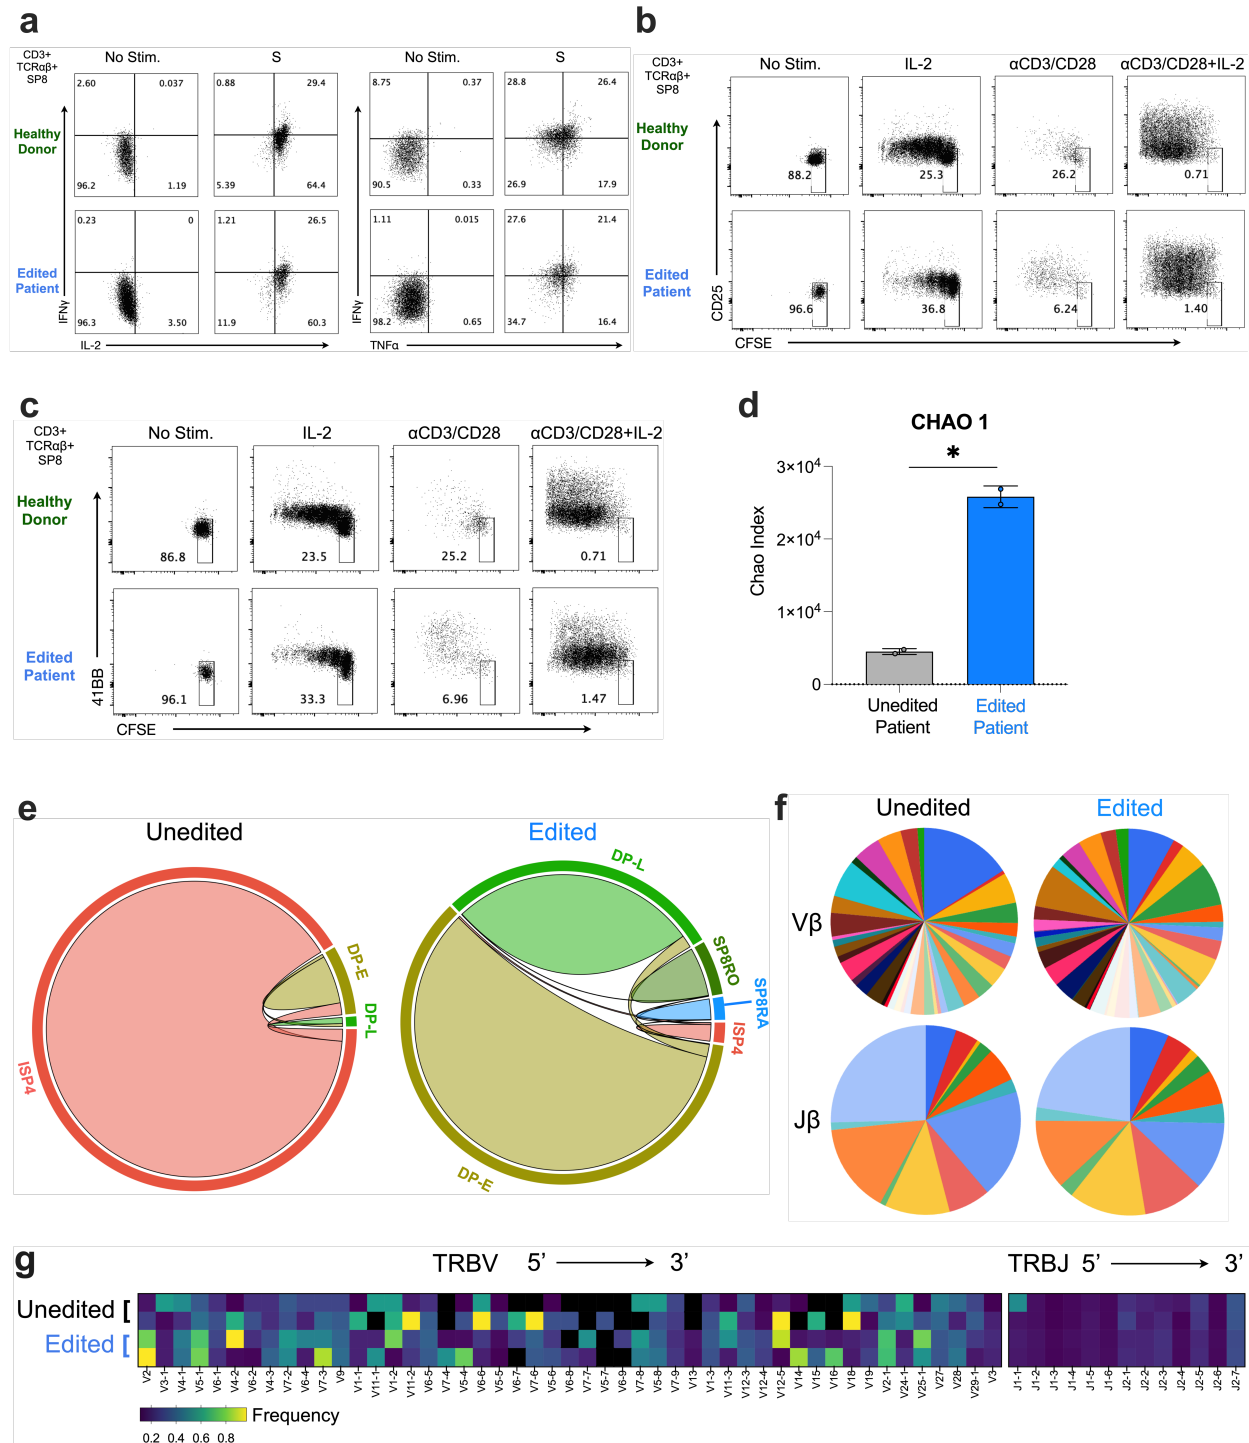

**Figure S7. Base editing of CD3 $\delta$  SCID HSPCs recapitulates functional T cells with TCR diversity, Related to Fig. 7.**

**a-c)** Representative flow cytometry profiles of HD (green) and edited patient (blue) ATOs. **a)** IFN $\gamma$ , IL-2, and TNF $\alpha$  production in SP8 T cells (CD3+TCR $\alpha\beta$ +CD8 $\alpha$ +CD4-CD45RA+) stimulated with or without anti-CD3/CD28 beads and IL2 for 24 hours, n=6. **b)** CD25 and **c)** 4-

1BB expression vs proliferation (CFSE dilution) of MACs isolated ATO-derived SP8 cells after culture without stim, with IL2 alone, anti-CD3/CD28 bead alone, and anti-CD3/CD28 bead + IL-2 for 5 days. Data is representative of three independent experiments. **d-h**) TCR diversity by CITE-seq of unedited (black) and edited (blue) patient ATOs harvested at week 8, n=2 per arm, two independent experiments. **d**) TCR diversity measured by CHAO-1 index. Statistical significance was calculated by Hutchinson t-test ( $*p < 5 \times 10^{-8}$ ). **e**) Chord diagrams depicting interconnection of TCR clonotypes in developing cell subsets in unedited (left) and edited (right) patient ATOs. Area of each segment correlates to the relative abundance of TCR clonotypes in indicated cells subsets. Curved lines indicate TCR clonotypes shared between cell subsets. **f**) Frequency of individual TRBV (top) and TRBJ (bottom) usage. **g**) Heatmap visualization of individual TRBV and TRBJ segments displayed in genomic order from 5' distal - > 3' proximal ends.
